# Supplementary material
Source: MDPI journal article supplement (https://www.mdpi.com/2073-4441/15/2/330)
Supplement: s1 [file s1]

# Supplementary Materials

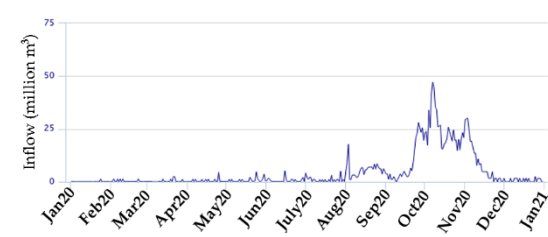

**Figure S1.** Water inflow of the Ubolratana Reservoir from Jan 2020- Jan 2021 [23].

**Table S1.** Risk level criteria for microplastic pollution [13].

| Polymer Hazard Index<br>(H) | Pollution Load Index<br>(PLI) | Risk Level Criteria |                          |
|-----------------------------|-------------------------------|---------------------|--------------------------|
| <10                         | <10                           | I                   | Low pollution            |
| 10-100                      | 10-20                         | II                  | Moderate pollution       |
| 100-1,000                   | 20-30                         | III                 | High pollution           |
| >1,000                      | >30                           | IV                  | Extremely high pollution |

**Table S2.** Polymer hazard score [25].

| Polymer Type               | Polymer Hazard Score |
|----------------------------|----------------------|
| Polypropylene              | 1                    |
| Polyethylene               | 11                   |
| Polystyrene                | 30                   |
| Polyamine                  | 47                   |
| Polyethylene terephthalate | 4                    |
